# Supplementary material for: Advanced molecular mechanisms of modified DRV compounds in targeting HIV-1 protease mutations and interrupting monomer dimerization
Source: Royal Society of Chemistry journal article supplement (doi:10.1039/d3cp05702j), 2024-01-01

## Support Information

### **Advanced Molecular Mechanisms of Modified DRV Compounds in Targeting HIV-1 Protease Mutations and Interrupting Monomer Dimerization**

*Bolin Tang, Song Luo, Qihang Wang, Pengfei Gao, Lili Duan\**

School of Physics and Electronics, Shandong Normal University, Jinan, 250014,

China

Corresponding author ([duanll@sdu.edu.cn](mailto:duanll@sdu.edu.cn))

Table S1: The binding free energy of each system calculated by MM/PBSA and IE methods. (all values are in kcal/mol).

| Drug    | Trajectory | $\Delta E_{ele}$ | $\Delta E_{vdW}$ | $\Delta G_{pol}$ | $\Delta G_{npol}$ | $\Delta H$ | $-T\Delta S$ | $\Delta G_{bind}$ | $\Delta G_{exp}$ | $\Delta G_{100ns}$ |
|---------|------------|------------------|------------------|------------------|-------------------|------------|--------------|-------------------|------------------|--------------------|
| DRV     | WT         | -81.13           | -64.84           | 100.99           | -7.11             | -52.09     | 13.99        | -38.10            | -11.32           | -37.39             |
|         | P30        | -56.23           | -70.58           | 89.23            | -7.43             | -45.01     | 14.03        | -30.98            | -8.83            | -29.87             |
|         | P51        | -57.15           | -63.98           | 84.92            | -7.21             | -43.42     | 13.97        | -29.45            | -8.19            | -27.10             |
| GRL-142 | WT         | -111.76          | -73.44           | 123.80           | -7.94             | -69.34     | 14.71        | -54.63            | -15.06           | -49.33             |
|         | P30        | -65.49           | -76.29           | 88.47            | -8.15             | -61.46     | 14.62        | -46.84            | -15.79           | -43.83             |
|         | P51        | -79.03           | -71.09           | 101.28           | -8.03             | -56.87     | 13.22        | -43.65            | -11.45           | -41.20             |
| GRL-003 | WT         | -99.49           | -75.55           | 116.83           | -8.04             | -66.25     | 14.53        | -51.72            | -14.09           | -49.27             |
|         | P30        | -100.07          | -68.76           | 114.21           | -8.31             | -62.93     | 12.57        | -50.36            | -10.36           | -49.18             |
|         | P51        | -103.05          | -69.50           | 122.78           | -8.16             | -57.93     | 17.96        | -39.97            | -9.74            | -43.54             |
| GRL-001 | WT         | -70.04           | -75.01           | 94.33            | -7.97             | -58.69     | 12.07        | -46.62            | -13.97           | -42.60             |
|         | P30        | -61.22           | -75.96           | 89.43            | -8.31             | -56.06     | 10.46        | -45.60            | -11.10           | -43.64             |
|         | P51        | -98.62           | -70.40           | 122.53           | -8.11             | -54.60     | 14.53        | -40.07            | -10.25           | -38.75             |
| GRL-121 | WT         | -105.44          | -72.17           | 123.48           | -7.77             | -61.90     | 15.72        | -46.18            | -12.77           | -46.27             |
|         | P30        | -66.83           | -76.20           | 93.24            | -8.05             | -57.84     | 12.14        | -45.70            | -11.66           | -44.50             |
|         | P51        | -62.72           | -77.95           | 95.17            | -8.05             | -53.55     | 13.48        | -40.07            | -9.74            | -39.30             |

Table S2: Energy terms of binding free energy for each residue obtained by ASIE method. (all values are in kcal/mol)

| System    | Residues | $\Delta\Delta E_{vdW}$ | $\Delta\Delta E_{ele}$ | $\Delta\Delta G_{pol}$ | $\Delta\Delta G_{npol}$ | $\Delta\Delta H$ | $-T\Delta\Delta S$ | $\Delta\Delta G_{bind}$ |
|-----------|----------|------------------------|------------------------|------------------------|-------------------------|------------------|--------------------|-------------------------|
| DRV (WT)  | R8       | 1.69                   | 0.59                   | -0.50                  | 0.25                    | 2.03             | -0.51              | 1.52                    |
|           | L23      | 1.22                   | 0.07                   | 0.09                   | 0.09                    | 1.47             | -0.16              | 1.31                    |
|           | D25      | -0.97                  | 3.85                   | -3.18                  | -0.04                   | -0.35            | -3.41              | -3.76                   |
|           | T26      | 0.04                   | -0.05                  | -0.03                  | 0.00                    | -0.04            | 0.00               | -0.04                   |
|           | D29      | 0.27                   | 1.28                   | -1.26                  | 0.04                    | 0.33             | -0.05              | 0.28                    |
|           | D30      | 0.20                   | 1.69                   | -1.57                  | 0.01                    | 0.33             | -0.02              | 0.31                    |
|           | T31      | 0.03                   | -0.03                  | 0.03                   | 0.00                    | 0.04             | 0.00               | 0.04                    |
|           | V32      | 0.64                   | -0.05                  | 0.03                   | 0.06                    | 0.68             | -0.81              | -0.13                   |
|           | I47      | 1.46                   | 0.02                   | -0.19                  | 0.22                    | 1.51             | -0.25              | 1.26                    |
|           | I50      | 2.16                   | 0.05                   | -0.22                  | 0.18                    | 2.17             | -0.46              | 1.71                    |
|           | L76      | 0.21                   | -0.08                  | 0.08                   | 0.01                    | 0.21             | -0.01              | 0.21                    |
|           | P81      | 0.51                   | -0.01                  | -0.05                  | 0.03                    | 0.48             | -0.32              | 0.16                    |
|           | V82      | 0.78                   | -0.05                  | 0.06                   | 0.07                    | 0.86             | -0.24              | 0.62                    |
|           | I84      | 2.93                   | -0.17                  | 0.12                   | 0.33                    | 3.21             | -0.54              | 2.67                    |
|           | R107     | 0.25                   | -0.75                  | 0.72                   | 0.01                    | 0.23             | -0.04              | 0.19                    |
|           | L122     | 0.67                   | -0.05                  | 0.13                   | 0.07                    | 0.82             | -0.03              | 0.79                    |
|           | D124     | -0.41                  | 2.86                   | -1.41                  | 0.02                    | 1.06             | -2.53              | -1.47                   |
|           | D128     | 1.22                   | -1.91                  | 1.49                   | 0.02                    | 0.82             | 0.09               | 0.91                    |
|           | D129     | 0.45                   | -1.01                  | 0.79                   | -0.01                   | 0.21             | -0.03              | 0.18                    |
|           | V131     | 0.64                   | 0.01                   | -0.02                  | 0.03                    | 0.65             | -0.03              | 0.62                    |
|           | I146     | 1.51                   | -0.02                  | -0.09                  | 0.19                    | 1.59             | -0.58              | 1.01                    |
|           | I149     | 2.38                   | 0.08                   | -0.22                  | 0.26                    | 2.50             | -0.75              | 1.75                    |
|           | L175     | 0.16                   | 0.01                   | 0.02                   | 0.00                    | 0.19             | 0.00               | 0.19                    |
| T179      | 0.20     | -0.07                  | 0.05                   | 0.01                   | 0.20                    | -0.01            | 0.18               |                         |
| P180      | 0.56     | 0.05                   | 0.02                   | 0.03                   | 0.67                    | -0.20            | 0.46               |                         |
| V181      | 0.46     | -0.03                  | 0.02                   | 0.07                   | 0.52                    | -0.17            | 0.35               |                         |
| I183      | 2.35     | -0.01                  | 0.07                   | 0.30                   | 2.71                    | -0.29            | 2.42               |                         |
| DRV (P30) | R8       | 0.40                   | -0.43                  | 0.46                   | 0.01                    | 0.45             | -0.03              | 0.41                    |
|           | L23      | 1.65                   | 0.00                   | 0.09                   | 0.20                    | 1.94             | -0.15              | 1.80                    |
|           | D25      | -1.87                  | 6.45                   | -4.41                  | 0.18                    | 0.35             | -3.66              | -3.30                   |
|           | D29      | 0.28                   | -0.92                  | 0.81                   | 0.00                    | 0.17             | -0.06              | 0.11                    |
|           | D30      | 0.06                   | -0.59                  | 0.51                   | 0.00                    | -0.02            | -0.01              | -0.04                   |
|           | I32      | 0.74                   | 0.00                   | -0.04                  | 0.11                    | 0.81             | -0.24              | 0.57                    |
|           | I47      | 1.23                   | -0.01                  | -0.15                  | 0.19                    | 1.25             | -0.24              | 1.02                    |
|           | I50      | 2.07                   | 0.18                   | -0.36                  | 0.29                    | 2.18             | -1.03              | 1.15                    |
|           | L76      | 0.07                   | 0.02                   | -0.02                  | 0.00                    | 0.08             | 0.00               | 0.08                    |
|           | T80      | 0.25                   | -0.02                  | 0.02                   | 0.02                    | 0.28             | -0.02              | 0.26                    |
|           | P81      | 0.82                   | 0.16                   | -0.12                  | 0.06                    | 0.91             | -0.18              | 0.74                    |
|           | V84      | 1.15                   | -0.01                  | 0.13                   | 0.17                    | 1.43             | -0.33              | 1.10                    |
|           | R107     | 1.20                   | 0.71                   | -0.62                  | 0.17                    | 1.46             | -0.50              | 0.96                    |
|           | L122     | 1.16                   | 0.00                   | 0.07                   | 0.14                    | 1.37             | -0.25              | 1.12                    |

|                 |      |       |       |       |      |       |       |       |
|-----------------|------|-------|-------|-------|------|-------|-------|-------|
|                 | D124 | 1.70  | -0.47 | 0.49  | 0.04 | 1.75  | -0.47 | 1.29  |
|                 | T125 | 0.05  | 0.04  | -0.11 | 0.00 | -0.02 | 0.00  | -0.02 |
|                 | D128 | 0.63  | 0.78  | -0.90 | 0.07 | 0.57  | -0.33 | 0.24  |
|                 | D129 | 0.18  | 1.30  | -1.22 | 0.00 | 0.27  | 0.02  | 0.28  |
|                 | T130 | 0.03  | -0.03 | 0.04  | 0.00 | 0.04  | 0.00  | 0.03  |
|                 | I131 | 0.90  | -0.03 | -0.02 | 0.10 | 0.94  | -0.12 | 0.83  |
|                 | K144 | 0.04  | -0.42 | 0.38  | 0.00 | 0.00  | -0.01 | -0.01 |
|                 | I146 | 1.46  | -0.01 | -0.12 | 0.32 | 1.65  | -0.17 | 1.48  |
|                 | I149 | 2.03  | -0.01 | -0.07 | 0.29 | 2.25  | -0.61 | 1.63  |
|                 | L175 | 0.33  | -0.12 | 0.10  | 0.03 | 0.35  | -0.01 | 0.34  |
|                 | T179 | 0.34  | 0.04  | -0.02 | 0.03 | 0.39  | -0.04 | 0.35  |
|                 | P180 | 0.72  | 0.08  | -0.06 | 0.05 | 0.79  | -0.20 | 0.58  |
|                 | V183 | 1.54  | 0.09  | -0.07 | 0.17 | 1.73  | -0.38 | 1.35  |
| DRV (P51)       | R8   | 0.22  | -0.69 | 0.66  | 0.01 | 0.20  | -0.02 | 0.17  |
|                 | L23  | 0.71  | -0.08 | 0.13  | 0.09 | 0.85  | -0.08 | 0.78  |
|                 | D25  | -0.58 | 3.88  | -3.11 | 0.03 | 0.22  | -2.50 | -2.28 |
|                 | D29  | 1.17  | -1.86 | 1.43  | 0.07 | 0.81  | 0.01  | 0.82  |
|                 | D30  | 0.55  | -1.18 | 0.90  | 0.01 | 0.28  | 0.03  | 0.31  |
|                 | I32  | 1.09  | 0.02  | -0.12 | 0.09 | 1.07  | -0.15 | 0.92  |
|                 | I47  | 1.12  | -0.02 | -0.11 | 0.13 | 1.12  | -0.15 | 0.97  |
|                 | I50  | 2.83  | 0.09  | -0.19 | 0.33 | 3.05  | -0.65 | 2.41  |
|                 | L76  | 0.76  | -0.01 | -0.03 | 0.08 | 0.80  | -0.10 | 0.70  |
|                 | T80  | 0.18  | -0.12 | 0.13  | 0.01 | 0.20  | -0.01 | 0.19  |
|                 | P81  | 0.50  | 0.06  | 0.05  | 0.03 | 0.63  | -0.10 | 0.53  |
|                 | I82  | 0.66  | -0.04 | 0.04  | 0.10 | 0.78  | -0.30 | 0.48  |
|                 | V84  | 1.10  | -0.01 | 0.06  | 0.12 | 1.27  | -0.14 | 1.13  |
|                 | R107 | 0.79  | 0.74  | -0.63 | 0.06 | 0.96  | -0.17 | 0.79  |
|                 | L122 | 1.32  | 0.00  | 0.00  | 0.14 | 1.45  | -0.22 | 1.23  |
|                 | D124 | 2.15  | -0.37 | 0.31  | 0.12 | 2.22  | -0.75 | 1.46  |
|                 | T125 | 0.03  | -0.04 | -0.02 | 0.00 | -0.03 | 0.00  | -0.03 |
|                 | D128 | 0.14  | 1.10  | -1.06 | 0.00 | 0.18  | -0.03 | 0.15  |
|                 | D129 | 0.19  | 1.68  | -1.59 | 0.02 | 0.30  | -0.04 | 0.26  |
|                 | T130 | 0.03  | -0.03 | 0.03  | 0.00 | 0.03  | 0.00  | 0.03  |
|                 | I131 | 0.99  | 0.01  | -0.08 | 0.10 | 1.02  | -0.11 | 0.91  |
|                 | K144 | 0.03  | -0.68 | 0.64  | 0.00 | -0.02 | -0.02 | -0.03 |
|                 | I146 | 0.80  | -0.07 | -0.05 | 0.12 | 0.81  | -0.08 | 0.73  |
|                 | I149 | 3.20  | 0.19  | -0.24 | 0.38 | 3.52  | -0.91 | 2.61  |
|                 | L175 | 0.33  | -0.08 | 0.04  | 0.03 | 0.31  | -0.02 | 0.30  |
|                 | T179 | 0.18  | -0.14 | 0.12  | 0.01 | 0.17  | -0.01 | 0.16  |
|                 | P180 | 0.51  | 0.03  | -0.07 | 0.05 | 0.52  | -0.19 | 0.33  |
|                 | I181 | 0.84  | 0.04  | -0.20 | 0.12 | 0.80  | -0.18 | 0.62  |
|                 | V183 | 1.21  | -0.07 | 0.02  | 0.13 | 1.28  | -0.14 | 1.14  |
| GRL-142<br>(WT) | R8   | 1.05  | -1.10 | 1.10  | 0.12 | 1.17  | -0.11 | 1.06  |

|         |       |       |       |       |       |       |       |      |
|---------|-------|-------|-------|-------|-------|-------|-------|------|
| L23     | 0.66  | -0.07 | 0.23  | 0.07  | 0.89  | -0.06 | 0.84  |      |
| D25     | -2.85 | 4.31  | -3.81 | -0.05 | -2.40 | -5.20 | -7.60 |      |
| D29     | 1.21  | -1.50 | 1.26  | -0.02 | 0.94  | 0.03  | 0.97  |      |
| D30     | 0.70  | -0.74 | 0.49  | 0.03  | 0.48  | -0.05 | 0.43  |      |
| V32     | 0.72  | 0.00  | 0.02  | 0.06  | 0.81  | -0.05 | 0.76  |      |
| I47     | 1.20  | -0.02 | 0.01  | 0.10  | 1.29  | -0.16 | 1.14  |      |
| I50     | 2.00  | 0.14  | -0.24 | 0.21  | 2.10  | -0.63 | 1.47  |      |
| L76     | 0.30  | 0.02  | 0.03  | 0.01  | 0.36  | -0.01 | 0.35  |      |
| T80     | 0.10  | -0.06 | 0.06  | 0.00  | 0.10  | 0.00  | 0.10  |      |
| P81     | 0.31  | 0.01  | 0.04  | 0.02  | 0.38  | -0.04 | 0.35  |      |
| V82     | 0.52  | -0.03 | 0.04  | 0.09  | 0.63  | -0.15 | 0.47  |      |
| I84     | 1.72  | -0.04 | 0.23  | 0.24  | 2.15  | -0.40 | 1.75  |      |
| R107    | 2.29  | 1.14  | -0.96 | 0.33  | 2.80  | -0.50 | 2.29  |      |
| L122    | 1.35  | 0.04  | 0.18  | 0.09  | 1.65  | -0.08 | 1.58  |      |
| D124    | -1.39 | 3.37  | -1.76 | -0.08 | 0.14  | -3.73 | -3.59 |      |
| D128    | 1.36  | 1.16  | -1.19 | 0.10  | 1.42  | -0.37 | 1.05  |      |
| D129    | 0.16  | 2.77  | -2.11 | 0.09  | 0.91  | -1.79 | -0.89 |      |
| T130    | 0.03  | -0.02 | 0.02  | 0.00  | 0.04  | 0.00  | 0.04  |      |
| V131    | 0.83  | 0.01  | 0.00  | 0.06  | 0.90  | -0.16 | 0.74  |      |
| I146    | 2.38  | 0.04  | -0.01 | 0.14  | 2.54  | -0.45 | 2.09  |      |
| I149    | 2.34  | 0.09  | -0.24 | 0.27  | 2.46  | -0.45 | 2.01  |      |
| L175    | 0.44  | -0.03 | 0.16  | 0.00  | 0.58  | -0.02 | 0.56  |      |
| T179    | 0.22  | -0.27 | 0.20  | 0.02  | 0.18  | 0.00  | 0.17  |      |
| P180    | 0.43  | 0.04  | -0.01 | 0.07  | 0.53  | -0.42 | 0.11  |      |
| V181    | 1.02  | 0.00  | -0.03 | 0.12  | 1.12  | -0.15 | 0.97  |      |
| I183    | 2.68  | -0.04 | -0.07 | 0.32  | 2.88  | -0.39 | 2.49  |      |
| GRL-142 | R8    | 2.45  | 0.90  | -0.73 | 0.35  | 2.97  | -0.68 | 2.29 |
| (P30)   |       |       |       |       |       |       |       |      |
| L23     | 1.59  | -0.05 | 0.20  | 0.15  | 1.89  | -0.38 | 1.51  |      |
| D25     | -0.94 | 5.12  | -4.17 | -0.02 | -0.02 | -3.34 | -3.36 |      |
| T26     | 0.04  | 0.00  | -0.07 | 0.00  | -0.03 | 0.00  | -0.03 |      |
| D29     | 0.77  | 0.86  | -0.93 | 0.10  | 0.80  | -0.12 | 0.68  |      |
| D30     | 0.74  | 0.54  | -0.74 | 0.09  | 0.64  | -0.22 | 0.42  |      |
| I32     | 1.01  | -0.02 | 0.00  | 0.07  | 1.06  | -0.25 | 0.81  |      |
| I47     | 2.31  | -0.02 | -0.06 | 0.21  | 2.44  | -0.32 | 2.12  |      |
| I50     | 2.94  | 0.01  | -0.11 | 0.37  | 3.22  | -0.53 | 2.69  |      |
| L76     | 1.46  | -0.05 | -0.07 | 0.12  | 1.46  | -0.13 | 1.33  |      |
| T80     | 0.29  | -0.47 | 0.27  | 0.01  | 0.09  | -0.01 | 0.08  |      |
| P81     | 0.37  | 0.01  | 0.02  | 0.02  | 0.42  | -0.41 | 0.01  |      |
| V84     | 1.96  | -0.12 | 0.12  | 0.21  | 2.16  | -0.17 | 1.99  |      |
| R107    | 0.40  | -0.62 | 0.64  | 0.03  | 0.45  | -0.03 | 0.42  |      |
| L122    | 0.67  | -0.06 | 0.18  | 0.08  | 0.87  | -0.04 | 0.83  |      |
| D124    | -0.26 | 2.66  | -1.24 | 0.06  | 1.22  | -2.27 | -1.05 |      |
| D128    | 1.29  | -1.40 | 1.18  | -0.03 | 1.05  | 0.00  | 1.04  |      |

|         |      |       |       |       |       |       |       |       |
|---------|------|-------|-------|-------|-------|-------|-------|-------|
|         | D129 | 0.81  | -0.81 | 0.53  | 0.04  | 0.57  | -0.05 | 0.52  |
|         | T130 | 0.02  | 0.03  | -0.03 | 0.00  | 0.03  | 0.00  | 0.03  |
|         | I131 | 1.04  | 0.02  | 0.01  | 0.13  | 1.19  | -0.48 | 0.71  |
|         | I146 | 0.87  | -0.01 | 0.07  | 0.13  | 1.05  | -0.36 | 0.69  |
|         | I149 | 2.82  | 0.02  | -0.12 | 0.25  | 2.96  | -0.58 | 2.37  |
|         | L175 | 0.20  | 0.02  | 0.02  | 0.00  | 0.24  | -0.01 | 0.23  |
|         | T179 | 0.10  | -0.02 | 0.03  | 0.01  | 0.11  | 0.00  | 0.11  |
|         | P180 | 0.38  | 0.01  | 0.06  | 0.03  | 0.48  | -0.04 | 0.44  |
|         | V183 | 0.76  | -0.01 | 0.11  | 0.08  | 0.93  | -0.09 | 0.84  |
| GRL-142 | R8   | 0.50  | -0.93 | 0.89  | 0.05  | 0.51  | -0.07 | 0.44  |
| (P51)   |      |       |       |       |       |       |       |       |
|         | L23  | 1.07  | -0.05 | 0.14  | 0.14  | 1.31  | -0.18 | 1.13  |
|         | D25  | -0.79 | 5.17  | -3.62 | 0.03  | 0.79  | -3.08 | -2.29 |
|         | D29  | 1.21  | -1.56 | 1.26  | 0.07  | 0.98  | -0.06 | 0.92  |
|         | D30  | 0.59  | -1.10 | 0.80  | 0.02  | 0.31  | 0.09  | 0.40  |
|         | I32  | 2.18  | 0.02  | -0.03 | 0.21  | 2.38  | -0.68 | 1.70  |
|         | I47  | 1.41  | -0.02 | -0.05 | 0.15  | 1.49  | -0.19 | 1.30  |
|         | I50  | 2.76  | 0.09  | -0.18 | 0.29  | 2.96  | -0.50 | 2.46  |
|         | L76  | 1.13  | -0.01 | 0.00  | 0.09  | 1.22  | -0.10 | 1.12  |
|         | T80  | 0.24  | -0.09 | 0.05  | 0.01  | 0.21  | -0.01 | 0.20  |
|         | P81  | 0.73  | -0.01 | 0.07  | 0.07  | 0.87  | -0.19 | 0.68  |
|         | I82  | 0.48  | -0.03 | 0.02  | 0.08  | 0.54  | -0.29 | 0.26  |
|         | V84  | 1.13  | 0.21  | -0.19 | 0.14  | 1.30  | -0.18 | 1.12  |
|         | R107 | 0.76  | 1.01  | -0.85 | 0.07  | 1.00  | -0.25 | 0.75  |
|         | L122 | 1.17  | 0.02  | 0.00  | 0.11  | 1.31  | -0.12 | 1.19  |
|         | D124 | 1.81  | -0.81 | 0.89  | 0.13  | 2.02  | -0.71 | 1.31  |
|         | D128 | 0.28  | 1.12  | -1.10 | 0.02  | 0.33  | -0.05 | 0.28  |
|         | D129 | -2.31 | 3.48  | -2.81 | 0.29  | -1.35 | -4.69 | -6.04 |
|         | T130 | 0.02  | -0.02 | 0.03  | 0.00  | 0.03  | 0.00  | 0.03  |
|         | I131 | 1.17  | 0.03  | -0.18 | 0.17  | 1.19  | -0.63 | 0.56  |
|         | I146 | 1.89  | -0.02 | -0.06 | 0.14  | 1.95  | -0.70 | 1.25  |
|         | I149 | 3.40  | 0.14  | -0.11 | 0.32  | 3.75  | -0.59 | 3.15  |
|         | L175 | 0.93  | -0.07 | 0.11  | 0.06  | 1.04  | -0.09 | 0.94  |
|         | T179 | 0.24  | -0.40 | 0.22  | 0.02  | 0.08  | -0.06 | 0.02  |
|         | P180 | 0.49  | 0.09  | -0.08 | 0.04  | 0.54  | -0.19 | 0.35  |
|         | I181 | 0.74  | 0.00  | -0.10 | 0.10  | 0.74  | -0.41 | 0.33  |
|         | V183 | 1.33  | -0.02 | -0.02 | 0.16  | 1.46  | -0.15 | 1.30  |
| GRL-003 | R8   | 1.04  | -0.96 | 0.98  | 0.13  | 1.19  | -0.09 | 1.10  |
| (WT)    |      |       |       |       |       |       |       |       |
|         | L23  | 0.60  | -0.08 | 0.19  | 0.05  | 0.76  | -0.04 | 0.72  |
|         | D25  | -2.62 | 4.60  | -3.34 | -0.06 | -1.42 | -4.73 | -6.15 |
|         | T26  | 0.05  | 0.07  | -0.16 | 0.00  | -0.03 | 0.00  | -0.03 |
|         | D29  | 1.32  | -1.06 | 0.81  | -0.01 | 1.06  | 0.08  | 1.13  |
|         | D30  | 0.75  | -0.84 | 0.52  | 0.02  | 0.45  | 0.00  | 0.46  |

|         |       |       |       |       |       |       |       |       |
|---------|-------|-------|-------|-------|-------|-------|-------|-------|
| T31     | 0.03  | 0.05  | -0.05 | 0.00  | 0.03  | 0.00  | 0.03  |       |
| V32     | 0.70  | -0.01 | 0.03  | 0.05  | 0.76  | -0.06 | 0.71  |       |
| I47     | 1.19  | -0.02 | 0.02  | 0.10  | 1.29  | -0.11 | 1.18  |       |
| I50     | 2.42  | 0.12  | -0.27 | 0.19  | 2.46  | -0.29 | 2.17  |       |
| L76     | 0.25  | 0.02  | 0.01  | 0.01  | 0.29  | -0.01 | 0.28  |       |
| P81     | 0.16  | 0.03  | 0.03  | 0.00  | 0.23  | -0.01 | 0.22  |       |
| V82     | 0.60  | -0.02 | 0.05  | 0.13  | 0.76  | -0.35 | 0.41  |       |
| I84     | 1.43  | -0.01 | 0.36  | 0.17  | 1.96  | -0.69 | 1.27  |       |
| R107    | 2.06  | 0.57  | -0.50 | 0.27  | 2.41  | -0.31 | 2.10  |       |
| L122    | 0.97  | 0.05  | 0.09  | 0.07  | 1.17  | -0.05 | 1.11  |       |
| D124    | -2.15 | 3.14  | -1.08 | -0.02 | -0.12 | -4.31 | -4.43 |       |
| D128    | 1.08  | 1.07  | -1.13 | 0.10  | 1.12  | -0.43 | 0.69  |       |
| D129    | -1.01 | 2.94  | -2.39 | 0.15  | -0.31 | -2.92 | -3.23 |       |
| T130    | 0.03  | -0.02 | 0.02  | 0.00  | 0.04  | 0.00  | 0.04  |       |
| V131    | 0.89  | 0.02  | -0.02 | 0.06  | 0.95  | -0.12 | 0.83  |       |
| K144    | 0.44  | -0.85 | 0.78  | 0.08  | 0.44  | -0.06 | 0.37  |       |
| I146    | 2.60  | 0.02  | -0.06 | 0.17  | 2.73  | -0.50 | 2.23  |       |
| I149    | 2.65  | 0.03  | 0.02  | 0.32  | 3.02  | -0.90 | 2.12  |       |
| L175    | 0.94  | -0.05 | 0.08  | 0.05  | 1.02  | -0.09 | 0.92  |       |
| T179    | 0.15  | -0.20 | 0.15  | 0.01  | 0.11  | 0.00  | 0.11  |       |
| P180    | 0.59  | 0.10  | -0.09 | 0.06  | 0.66  | -0.17 | 0.49  |       |
| V181    | 0.98  | -0.02 | -0.06 | 0.12  | 1.01  | -0.12 | 0.90  |       |
| I183    | 2.58  | -0.06 | -0.09 | 0.30  | 2.73  | -0.20 | 2.53  |       |
| GRL-003 | R8    | 2.54  | 0.40  | -0.32 | 0.31  | 2.93  | -0.64 | 2.29  |
| (P30)   | L23   | 1.74  | -0.06 | 0.11  | 0.15  | 1.94  | -0.28 | 1.66  |
|         | D25   | -3.92 | 5.22  | -4.03 | -0.02 | -2.74 | -6.24 | -8.98 |
|         | D29   | 0.99  | 0.89  | -0.96 | 0.11  | 1.02  | -0.10 | 0.92  |
|         | D30   | 0.68  | 0.53  | -0.75 | 0.09  | 0.55  | -0.33 | 0.22  |
|         | T31   | 0.04  | 0.03  | -0.02 | 0.00  | 0.06  | 0.00  | 0.05  |
|         | I32   | 0.98  | -0.04 | 0.03  | 0.07  | 1.04  | -0.24 | 0.80  |
|         | K45   | 0.62  | -0.32 | 0.27  | 0.12  | 0.70  | -0.16 | 0.53  |
|         | I47   | 1.99  | 0.01  | -0.07 | 0.19  | 2.12  | -0.42 | 1.69  |
|         | I50   | 2.62  | 0.28  | -0.34 | 0.22  | 2.78  | -0.51 | 2.27  |
|         | L76   | 1.27  | -0.05 | -0.05 | 0.10  | 1.28  | -0.15 | 1.13  |
|         | T80   | 0.29  | -0.07 | 0.14  | 0.02  | 0.38  | -0.02 | 0.36  |
|         | P81   | 0.53  | 0.12  | -0.10 | 0.05  | 0.60  | -0.15 | 0.45  |
|         | V84   | 1.65  | -0.11 | 0.11  | 0.17  | 1.82  | -0.22 | 1.60  |
|         | R107  | 0.72  | -0.78 | 0.79  | 0.08  | 0.81  | -0.05 | 0.76  |
|         | L122  | 0.46  | -0.06 | 0.17  | 0.04  | 0.61  | -0.02 | 0.60  |
|         | D124  | -2.64 | 3.58  | -1.45 | 0.05  | -0.46 | -4.13 | -4.59 |
|         | D128  | 1.28  | -1.20 | 0.97  | -0.02 | 1.03  | -0.01 | 1.01  |
|         | D129  | 0.67  | -0.80 | 0.54  | 0.03  | 0.43  | 0.04  | 0.48  |
|         | I131  | 1.26  | 0.01  | 0.04  | 0.19  | 1.49  | -0.76 | 0.73  |

|         |       |       |       |       |       |       |       |       |
|---------|-------|-------|-------|-------|-------|-------|-------|-------|
|         | KS144 | 0.11  | 0.12  | -0.12 | 0.00  | 0.12  | -0.01 | 0.10  |
|         | I146  | 1.17  | -0.01 | -0.01 | 0.10  | 1.25  | -0.07 | 1.18  |
|         | I149  | 2.58  | 0.06  | -0.12 | 0.30  | 2.83  | -0.82 | 2.01  |
|         | L175  | 0.81  | 0.01  | 0.01  | 0.07  | 0.90  | -0.07 | 0.83  |
|         | T179  | 0.27  | -0.02 | 0.00  | 0.02  | 0.27  | -0.01 | 0.26  |
|         | P180  | 0.75  | 0.00  | 0.09  | 0.08  | 0.92  | -0.36 | 0.57  |
|         | V183  | 0.91  | -0.01 | 0.14  | 0.11  | 1.15  | -0.11 | 1.03  |
| GRL-003 | R8    | 1.09  | -1.04 | 1.10  | 0.11  | 1.25  | -0.10 | 1.15  |
| (P51)   |       |       |       |       |       |       |       |       |
|         | L23   | 0.62  | -0.07 | 0.22  | 0.06  | 0.83  | -0.10 | 0.72  |
|         | D25   | -1.28 | 5.06  | -4.37 | -0.02 | -0.61 | -4.26 | -4.87 |
|         | D29   | 1.27  | -1.17 | 0.93  | -0.03 | 1.02  | 0.06  | 1.07  |
|         | D30   | 0.71  | -0.74 | 0.49  | 0.04  | 0.49  | -0.09 | 0.40  |
|         | T31   | 0.03  | 0.06  | -0.05 | 0.00  | 0.04  | 0.00  | 0.04  |
|         | I32   | 1.19  | 0.01  | 0.05  | 0.17  | 1.42  | -0.74 | 0.69  |
|         | K45   | 0.11  | 0.21  | -0.19 | 0.00  | 0.13  | -0.02 | 0.11  |
|         | I47   | 1.24  | -0.02 | 0.01  | 0.10  | 1.34  | -0.11 | 1.24  |
|         | I50   | 2.77  | 0.13  | -0.36 | 0.29  | 2.84  | -0.68 | 2.16  |
|         | L76   | 0.48  | 0.02  | 0.02  | 0.03  | 0.55  | -0.04 | 0.51  |
|         | T80   | 0.24  | -0.06 | 0.04  | 0.03  | 0.25  | -0.02 | 0.24  |
|         | P81   | 0.81  | 0.00  | 0.09  | 0.08  | 0.98  | -0.17 | 0.81  |
|         | I82   | 0.46  | -0.04 | 0.06  | 0.06  | 0.54  | -0.17 | 0.37  |
|         | V84   | 0.87  | -0.05 | 0.29  | 0.11  | 1.23  | -0.36 | 0.87  |
|         | R107  | 2.40  | 0.52  | -0.40 | 0.27  | 2.79  | -0.66 | 2.13  |
|         | L122  | 1.39  | 0.08  | 0.12  | 0.08  | 1.67  | -0.08 | 1.58  |
|         | D124  | -2.02 | 3.64  | -1.77 | -0.05 | -0.20 | -4.25 | -4.46 |
|         | D128  | 1.77  | 0.99  | -1.11 | 0.07  | 1.71  | -0.24 | 1.47  |
|         | D129  | -0.34 | 2.77  | -2.28 | 0.10  | 0.25  | -1.81 | -1.56 |
|         | T130  | 0.03  | -0.02 | 0.02  | 0.00  | 0.03  | 0.00  | 0.03  |
|         | I131  | 1.18  | 0.02  | -0.01 | 0.13  | 1.31  | -0.26 | 1.05  |
|         | K144  | 0.10  | -0.62 | 0.58  | 0.01  | 0.07  | -0.01 | 0.05  |
|         | I146  | 2.19  | 0.04  | 0.02  | 0.19  | 2.44  | -0.51 | 1.94  |
|         | I149  | 2.38  | 0.32  | -0.21 | 0.25  | 2.74  | -0.55 | 2.19  |
|         | L175  | 0.21  | -0.03 | 0.08  | 0.00  | 0.26  | 0.00  | 0.25  |
|         | T179  | 0.21  | -0.13 | 0.11  | 0.02  | 0.21  | -0.02 | 0.19  |
|         | P180  | 0.51  | 0.11  | -0.12 | 0.05  | 0.54  | -0.22 | 0.33  |
|         | I181  | 1.57  | 0.04  | -0.09 | 0.21  | 1.73  | -0.36 | 1.36  |
|         | V183  | 1.44  | 0.01  | -0.03 | 0.15  | 1.56  | -0.12 | 1.45  |
| GRL-001 | R8    | 0.88  | -0.99 | 0.98  | 0.09  | 0.97  | -0.08 | 0.89  |
| (WT)    |       |       |       |       |       |       |       |       |
|         | L23   | 0.67  | -0.06 | 0.22  | 0.06  | 0.90  | -0.03 | 0.86  |
|         | D25   | -1.93 | 4.47  | -3.54 | -0.04 | -1.04 | -4.45 | -5.49 |
|         | D29   | 1.26  | -0.89 | 0.60  | 0.08  | 1.05  | 0.15  | 1.19  |
|         | D30   | 0.66  | -0.71 | 0.44  | 0.01  | 0.40  | -0.03 | 0.37  |



|         |       |       |       |       |       |       |       |       |
|---------|-------|-------|-------|-------|-------|-------|-------|-------|
| T31     | 0.03  | 0.05  | -0.05 | 0.00  | 0.03  | 0.00  | 0.03  |       |
| V32     | 0.77  | 0.00  | 0.05  | 0.06  | 0.88  | -0.09 | 0.79  |       |
| I47     | 1.19  | -0.02 | 0.00  | 0.10  | 1.28  | -0.10 | 1.18  |       |
| I50     | 2.25  | 0.12  | -0.31 | 0.23  | 2.29  | -0.58 | 1.72  |       |
| L76     | 0.30  | 0.01  | 0.01  | 0.02  | 0.34  | -0.01 | 0.33  |       |
| T80     | 0.14  | -0.06 | 0.05  | 0.01  | 0.15  | -0.01 | 0.14  |       |
| P81     | 0.60  | 0.03  | 0.02  | 0.07  | 0.71  | -0.15 | 0.56  |       |
| V82     | 0.52  | -0.02 | 0.03  | 0.07  | 0.60  | -0.18 | 0.42  |       |
| I84     | 1.94  | -0.05 | 0.30  | 0.26  | 2.44  | -0.29 | 2.16  |       |
| A107    | 0.39  | 0.36  | -0.25 | 0.00  | 0.49  | -0.03 | 0.46  |       |
| L122    | 1.23  | 0.02  | 0.07  | 0.09  | 1.41  | -0.23 | 1.18  |       |
| D124    | -1.15 | 2.81  | -1.07 | -0.05 | 0.55  | -3.33 | -2.78 |       |
| T125    | 0.04  | -0.03 | -0.05 | 0.00  | -0.04 | 0.00  | -0.04 |       |
| D128    | 1.40  | 0.95  | -1.04 | 0.10  | 1.41  | -0.33 | 1.08  |       |
| D129    | 0.16  | 2.56  | -2.05 | 0.11  | 0.78  | -1.87 | -1.08 |       |
| T130    | 0.03  | -0.02 | 0.02  | 0.00  | 0.04  | 0.00  | 0.04  |       |
| V131    | 0.91  | 0.02  | -0.01 | 0.06  | 0.98  | -0.08 | 0.90  |       |
| K144    | 0.54  | -0.94 | 0.89  | 0.08  | 0.57  | -0.06 | 0.50  |       |
| I146    | 2.28  | 0.03  | -0.05 | 0.18  | 2.43  | -0.39 | 2.04  |       |
| I149    | 2.40  | 0.08  | -0.15 | 0.23  | 2.56  | -0.39 | 2.17  |       |
| L175    | 0.67  | -0.04 | 0.12  | 0.02  | 0.78  | -0.07 | 0.71  |       |
| T179    | 0.22  | -0.38 | 0.26  | 0.02  | 0.13  | 0.00  | 0.13  |       |
| P180    | 0.40  | 0.08  | 0.01  | 0.03  | 0.52  | -0.40 | 0.12  |       |
| V181    | 0.88  | -0.05 | -0.04 | 0.11  | 0.90  | -0.21 | 0.69  |       |
| I183    | 2.75  | -0.03 | -0.13 | 0.31  | 2.91  | -0.31 | 2.60  |       |
| GRL-001 | R8    | 0.28  | -0.68 | 0.69  | 0.01  | 0.29  | -0.01 | 0.28  |
| (P30)   |       |       |       |       |       |       |       |       |
|         | L23   | 0.98  | -0.08 | 0.17  | 0.15  | 1.23  | -0.25 | 0.98  |
|         | D25   | -0.49 | 4.60  | -3.52 | 0.08  | 0.66  | -3.76 | -3.10 |
|         | D29   | 1.31  | -1.09 | 0.84  | -0.03 | 1.02  | 0.05  | 1.08  |
|         | D30   | 0.70  | -0.89 | 0.62  | 0.02  | 0.45  | 0.20  | 0.65  |
|         | T31   | 0.03  | 0.04  | -0.04 | 0.00  | 0.04  | 0.00  | 0.04  |
|         | I32   | 2.03  | 0.02  | -0.03 | 0.21  | 2.23  | -0.55 | 1.67  |
|         | I47   | 1.28  | -0.01 | -0.04 | 0.13  | 1.36  | -0.20 | 1.17  |
|         | I50   | 2.68  | 0.06  | -0.15 | 0.31  | 2.91  | -0.51 | 2.40  |
|         | L76   | 1.13  | -0.01 | 0.02  | 0.09  | 1.23  | -0.08 | 1.15  |
|         | T80   | 0.16  | -0.03 | 0.01  | 0.01  | 0.16  | -0.01 | 0.15  |
|         | P81   | 0.61  | 0.02  | 0.05  | 0.06  | 0.73  | -0.17 | 0.57  |
|         | V84   | 1.20  | 0.17  | -0.18 | 0.16  | 1.35  | -0.10 | 1.25  |
|         | R107  | 2.76  | 0.38  | -0.34 | 0.30  | 3.11  | -0.53 | 2.57  |
|         | L122  | 1.75  | -0.06 | -0.12 | 0.21  | 1.78  | -0.21 | 1.57  |
|         | D124  | 1.35  | -0.56 | 0.94  | 0.09  | 1.82  | -0.26 | 1.57  |
|         | D128  | 0.63  | 0.92  | -0.95 | 0.08  | 0.68  | -0.06 | 0.62  |
|         | D129  | 0.72  | 0.40  | -0.62 | 0.08  | 0.58  | -0.35 | 0.24  |

|         |      |       |       |       |       |       |       |       |
|---------|------|-------|-------|-------|-------|-------|-------|-------|
|         | T130 | 0.04  | 0.03  | -0.02 | 0.00  | 0.05  | 0.00  | 0.05  |
|         | I131 | 1.24  | 0.00  | -0.01 | 0.08  | 1.31  | -0.10 | 1.20  |
|         | K144 | 0.40  | -0.28 | 0.23  | 0.06  | 0.41  | -0.06 | 0.35  |
|         | I146 | 1.57  | 0.00  | -0.04 | 0.17  | 1.69  | -0.31 | 1.38  |
|         | I149 | 2.98  | 0.26  | -0.35 | 0.24  | 3.13  | -0.60 | 2.53  |
|         | L175 | 1.30  | -0.02 | -0.12 | 0.12  | 1.27  | -0.19 | 1.09  |
|         | T179 | 0.16  | -0.29 | 0.21  | 0.01  | 0.10  | 0.00  | 0.10  |
|         | P180 | 0.39  | 0.14  | -0.11 | 0.04  | 0.47  | -0.11 | 0.37  |
|         | V183 | 1.36  | -0.09 | -0.06 | 0.17  | 1.38  | -0.12 | 1.26  |
| GRL-001 | R8   | 2.89  | 0.48  | -0.35 | 0.30  | 3.32  | -0.72 | 2.60  |
| (P51)   |      |       |       |       |       |       |       |       |
|         | L23  | 1.47  | -0.02 | 0.18  | 0.10  | 1.74  | -0.21 | 1.53  |
|         | D25  | -4.43 | 4.54  | -3.38 | -0.09 | -3.35 | -5.95 | -9.29 |
|         | D29  | 1.52  | 1.13  | -1.23 | 0.10  | 1.52  | -0.40 | 1.12  |
|         | D30  | -0.27 | 2.92  | -2.30 | 0.10  | 0.44  | -2.15 | -1.71 |
|         | T31  | 0.03  | 0.00  | 0.00  | 0.00  | 0.03  | 0.00  | 0.03  |
|         | I32  | 1.21  | 0.02  | -0.06 | 0.18  | 1.35  | -0.85 | 0.50  |
|         | K45  | 0.41  | -1.05 | 1.00  | 0.04  | 0.40  | -0.03 | 0.37  |
|         | I47  | 2.01  | -0.02 | 0.03  | 0.13  | 2.15  | -0.41 | 1.75  |
|         | I50  | 2.56  | 0.24  | -0.18 | 0.26  | 2.88  | -0.49 | 2.38  |
|         | L76  | 0.46  | -0.04 | 0.12  | 0.01  | 0.55  | -0.02 | 0.54  |
|         | T80  | 0.24  | -0.37 | 0.24  | 0.02  | 0.14  | 0.00  | 0.14  |
|         | P81  | 0.24  | 0.08  | 0.02  | 0.02  | 0.35  | -0.39 | -0.04 |
|         | I82  | 0.97  | 0.02  | -0.13 | 0.13  | 0.98  | -0.29 | 0.68  |
|         | V84  | 1.50  | -0.01 | 0.14  | 0.15  | 1.77  | -0.12 | 1.65  |
|         | R107 | 0.98  | -1.05 | 1.08  | 0.10  | 1.12  | -0.07 | 1.05  |
|         | L122 | 0.58  | -0.05 | 0.19  | 0.05  | 0.77  | -0.05 | 0.72  |
|         | D124 | -1.93 | 3.57  | -1.52 | 0.04  | 0.15  | -4.08 | -3.93 |
|         | D128 | 1.22  | -1.52 | 1.24  | -0.05 | 0.89  | -0.20 | 0.69  |
|         | D129 | 0.78  | -0.74 | 0.51  | 0.05  | 0.59  | -0.19 | 0.40  |
|         | T130 | 0.02  | 0.03  | -0.02 | 0.00  | 0.03  | 0.00  | 0.03  |
|         | I131 | 0.85  | 0.01  | 0.03  | 0.13  | 1.02  | -0.42 | 0.61  |
|         | K144 | 0.12  | 0.22  | -0.19 | 0.00  | 0.15  | -0.03 | 0.12  |
|         | I146 | 1.17  | -0.01 | 0.01  | 0.09  | 1.27  | -0.06 | 1.21  |
|         | I149 | 2.60  | 0.05  | -0.33 | 0.27  | 2.59  | -0.85 | 1.74  |
|         | L175 | 0.28  | 0.01  | 0.04  | 0.01  | 0.34  | -0.01 | 0.33  |
|         | T179 | 0.25  | -0.04 | 0.02  | 0.03  | 0.26  | -0.02 | 0.24  |
|         | P180 | 0.83  | 0.01  | 0.09  | 0.08  | 1.00  | -0.19 | 0.81  |
|         | I181 | 0.40  | -0.04 | 0.05  | 0.06  | 0.48  | -0.55 | -0.07 |
|         | V183 | 0.84  | 0.00  | 0.12  | 0.10  | 1.06  | -0.12 | 0.94  |
| GRL-121 | R8   | 0.98  | -0.88 | 0.87  | 0.12  | 1.09  | -0.11 | 0.98  |
| (WT)    |      |       |       |       |       |       |       |       |
|         | L23  | 0.67  | -0.05 | 0.20  | 0.08  | 0.89  | -0.06 | 0.83  |
|         | D25  | -2.02 | 3.86  | -3.26 | -0.02 | -1.45 | -5.54 | -6.99 |

|         |       |       |       |       |       |       |       |       |
|---------|-------|-------|-------|-------|-------|-------|-------|-------|
| D29     | 1.24  | -1.33 | 0.99  | 0.04  | 0.94  | -0.03 | 0.91  |       |
| D30     | 0.71  | -0.82 | 0.55  | 0.02  | 0.46  | -0.04 | 0.42  |       |
| V32     | 0.77  | 0.04  | 0.02  | 0.07  | 0.89  | -0.15 | 0.74  |       |
| I47     | 1.09  | 0.00  | 0.00  | 0.08  | 1.17  | -0.07 | 1.10  |       |
| I50     | 2.16  | 0.12  | -0.25 | 0.19  | 2.21  | -0.48 | 1.73  |       |
| L76     | 0.41  | 0.02  | 0.02  | 0.03  | 0.46  | -0.02 | 0.45  |       |
| T80     | 0.07  | -0.08 | 0.08  | 0.00  | 0.07  | 0.00  | 0.07  |       |
| P81     | 0.17  | 0.02  | 0.02  | 0.00  | 0.22  | -0.01 | 0.20  |       |
| V82     | 0.46  | -0.02 | 0.03  | 0.08  | 0.55  | -0.24 | 0.31  |       |
| I84     | 1.36  | 0.00  | 0.18  | 0.20  | 1.74  | -0.54 | 1.21  |       |
| R107    | 1.14  | 0.43  | -0.34 | 0.13  | 1.36  | -0.17 | 1.19  |       |
| L122    | 0.48  | 0.04  | 0.05  | 0.02  | 0.59  | -0.03 | 0.57  |       |
| D124    | -0.96 | 3.35  | -1.84 | -0.05 | 0.50  | -3.15 | -2.65 |       |
| T125    | 0.04  | -0.04 | -0.04 | 0.00  | -0.04 | 0.00  | -0.04 |       |
| D128    | 0.96  | 0.96  | -1.01 | 0.10  | 1.01  | -0.34 | 0.66  |       |
| D129    | 0.30  | 2.49  | -2.09 | 0.13  | 0.82  | -1.37 | -0.55 |       |
| T130    | 0.03  | -0.02 | 0.03  | 0.00  | 0.04  | 0.00  | 0.04  |       |
| V131    | 0.92  | 0.01  | 0.00  | 0.05  | 0.98  | -0.07 | 0.91  |       |
| K144    | 0.47  | -0.93 | 0.87  | 0.08  | 0.49  | -0.08 | 0.41  |       |
| I146    | 2.49  | 0.03  | -0.08 | 0.17  | 2.61  | -0.37 | 2.24  |       |
| I149    | 2.55  | 0.14  | -0.36 | 0.28  | 2.62  | -0.69 | 1.93  |       |
| L175    | 0.74  | -0.04 | 0.09  | 0.03  | 0.83  | -0.06 | 0.77  |       |
| T179    | 0.17  | -0.23 | 0.15  | 0.01  | 0.09  | 0.00  | 0.09  |       |
| P180    | 0.69  | 0.01  | 0.02  | 0.06  | 0.78  | -0.33 | 0.45  |       |
| V181    | 1.12  | -0.01 | -0.13 | 0.16  | 1.14  | -0.36 | 0.78  |       |
| I183    | 2.21  | 0.00  | -0.23 | 0.27  | 2.26  | -0.50 | 1.76  |       |
| GRL-121 | R8    | 0.95  | -0.88 | 0.89  | 0.10  | 1.06  | -0.11 | 0.95  |
| (P30)   |       |       |       |       |       |       |       |       |
|         | L23   | 1.03  | -0.01 | 0.09  | 0.14  | 1.26  | -0.38 | 0.88  |
|         | D25   | -0.48 | 3.99  | -2.70 | -0.02 | 0.79  | -2.36 | -1.57 |
|         | D29   | 1.19  | -1.15 | 0.87  | 0.02  | 0.93  | 0.01  | 0.93  |
|         | D30   | 0.66  | -1.03 | 0.73  | 0.02  | 0.38  | 0.12  | 0.50  |
|         | I32   | 2.10  | 0.02  | -0.03 | 0.22  | 2.32  | -0.59 | 1.73  |
|         | I47   | 1.24  | 0.00  | -0.04 | 0.13  | 1.33  | -0.14 | 1.19  |
|         | I50   | 2.43  | 0.12  | -0.21 | 0.29  | 2.63  | -0.50 | 2.14  |
|         | L76   | 1.22  | 0.00  | 0.00  | 0.10  | 1.31  | -0.12 | 1.20  |
|         | T80   | 0.21  | -0.05 | 0.05  | 0.02  | 0.22  | -0.01 | 0.21  |
|         | P81   | 0.65  | 0.01  | 0.05  | 0.05  | 0.76  | -0.10 | 0.66  |
|         | V84   | 1.26  | 0.20  | -0.18 | 0.18  | 1.45  | -0.15 | 1.30  |
|         | R107  | 1.36  | 0.49  | -0.39 | 0.13  | 1.60  | -0.32 | 1.28  |
|         | L122  | 1.20  | 0.07  | -0.10 | 0.12  | 1.28  | -0.18 | 1.10  |
|         | D124  | 1.66  | -0.26 | 0.48  | 0.07  | 1.95  | -0.81 | 1.14  |
|         | D128  | 1.25  | 1.03  | -1.09 | 0.10  | 1.29  | -0.20 | 1.08  |
|         | D129  | 0.25  | 2.78  | -2.05 | 0.06  | 1.05  | -1.99 | -0.95 |

|         |      |       |       |       |       |      |       |       |
|---------|------|-------|-------|-------|-------|------|-------|-------|
|         | T130 | 0.03  | -0.01 | 0.02  | 0.00  | 0.03 | 0.00  | 0.03  |
|         | I131 | 1.29  | 0.00  | -0.03 | 0.12  | 1.39 | -0.27 | 1.12  |
|         | K144 | 0.79  | -1.46 | 1.47  | 0.11  | 0.91 | -0.10 | 0.81  |
|         | I146 | 2.43  | 0.09  | 0.00  | 0.21  | 2.73 | -0.49 | 2.24  |
|         | I149 | 3.05  | 0.19  | -0.22 | 0.29  | 3.31 | -0.42 | 2.90  |
|         | L175 | 0.31  | -0.03 | 0.19  | 0.00  | 0.46 | -0.01 | 0.45  |
|         | T179 | 0.25  | -0.10 | 0.12  | 0.02  | 0.30 | -0.02 | 0.27  |
|         | P180 | 0.54  | 0.15  | -0.13 | 0.04  | 0.60 | -0.12 | 0.49  |
|         | V183 | 1.41  | -0.06 | -0.10 | 0.17  | 1.42 | -0.13 | 1.29  |
| GRL-121 | R8   | 1.69  | -0.95 | 0.94  | 0.24  | 1.92 | -0.22 | 1.71  |
| (P51)   |      |       |       |       |       |      |       |       |
|         | L23  | 1.03  | 0.00  | 0.11  | 0.13  | 1.28 | -0.25 | 1.03  |
|         | D25  | -0.39 | 4.14  | -2.85 | -0.01 | 0.89 | -2.23 | -1.34 |
|         | D29  | 1.15  | -1.13 | 0.85  | 0.06  | 0.93 | 0.03  | 0.96  |
|         | D30  | 0.62  | -1.10 | 0.80  | 0.02  | 0.34 | 0.11  | 0.45  |
|         | I32  | 1.97  | 0.03  | -0.03 | 0.21  | 2.17 | -0.77 | 1.41  |
|         | I47  | 1.41  | 0.00  | -0.06 | 0.16  | 1.51 | -0.26 | 1.25  |
|         | I50  | 2.66  | 0.10  | -0.17 | 0.29  | 2.88 | -0.55 | 2.34  |
|         | M54  | 0.13  | -0.09 | 0.09  | 0.00  | 0.14 | -0.01 | 0.13  |
|         | L76  | 1.05  | 0.00  | 0.00  | 0.08  | 1.13 | -0.07 | 1.05  |
|         | T80  | 0.25  | -0.10 | 0.06  | 0.01  | 0.23 | -0.02 | 0.21  |
|         | P81  | 0.76  | 0.03  | 0.06  | 0.05  | 0.91 | -0.22 | 0.69  |
|         | I82  | 0.54  | -0.03 | 0.02  | 0.08  | 0.61 | -0.56 | 0.05  |
|         | V84  | 1.17  | 0.21  | -0.23 | 0.16  | 1.32 | -0.18 | 1.13  |
|         | R107 | 0.43  | 0.46  | -0.33 | 0.00  | 0.56 | -0.03 | 0.53  |
|         | L122 | 1.21  | 0.07  | -0.13 | 0.12  | 1.27 | -0.12 | 1.14  |
|         | D124 | 1.70  | -0.18 | 0.43  | 0.07  | 2.02 | -0.77 | 1.25  |
|         | D128 | 1.10  | 1.13  | -1.13 | 0.11  | 1.20 | -0.43 | 0.77  |
|         | D129 | 0.18  | 2.87  | -2.17 | 0.11  | 1.00 | -2.24 | -1.25 |
|         | T130 | 0.03  | -0.01 | 0.02  | 0.00  | 0.03 | 0.00  | 0.03  |
|         | I131 | 1.16  | 0.02  | -0.05 | 0.12  | 1.25 | -0.71 | 0.54  |
|         | K144 | 0.86  | -1.55 | 1.52  | 0.12  | 0.94 | -0.11 | 0.84  |
|         | I146 | 2.07  | -0.03 | 0.03  | 0.13  | 2.19 | -0.51 | 1.68  |
|         | I149 | 3.22  | 0.17  | -0.18 | 0.34  | 3.55 | -0.66 | 2.89  |
|         | L175 | 0.40  | -0.04 | 0.22  | 0.01  | 0.59 | -0.02 | 0.57  |
|         | T179 | 0.28  | -0.06 | 0.11  | 0.02  | 0.35 | -0.03 | 0.32  |
|         | P180 | 0.65  | 0.14  | -0.12 | 0.04  | 0.72 | -0.12 | 0.60  |
|         | I181 | 0.74  | -0.02 | -0.09 | 0.08  | 0.70 | -0.29 | 0.42  |
|         | V183 | 1.43  | -0.06 | -0.10 | 0.16  | 1.43 | -0.21 | 1.22  |

Figure S1: Amino acid sequence of HIV-1 protease wild-type, P30, and P51 mutations

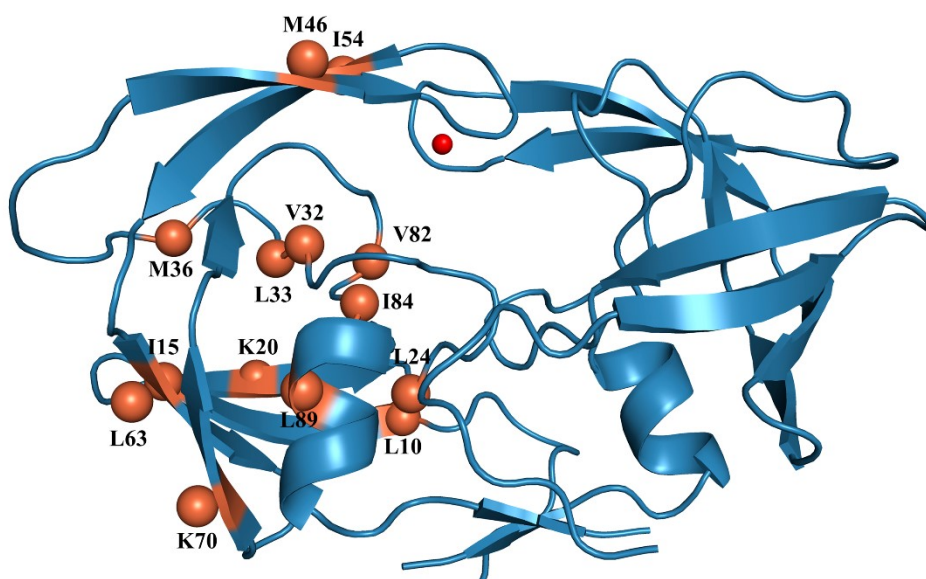

|                   |            |            |            |            |            |
|-------------------|------------|------------|------------|------------|------------|
| PR <sub>WT</sub>  | PQITLWQRPL | VTIKIGGQLK | EALLDTGADD | TVLEEMNLPG | RWKPKMIGGI |
| PR <sub>P30</sub> |            | I V R I    |            | I I        | L          |
| PR <sub>P51</sub> |            | I V R I    |            | IF I       | L          |
| PR <sub>WT</sub>  | GGFIKVRQYD | QILIEICGHK | AIGTVLVGPT | PVNIIGRNLL | TQIGCTLNF  |
| PR <sub>P30</sub> |            | P Q        |            | A V M      |            |
| PR <sub>P51</sub> | M          | P Q        |            | I V M      |            |

Figure S2: Root mean square deviation (RMSD) of the backbone atoms of five complexes during MD simulation, (A) DRV - PR (B) GRL-142 - PR (C) GRL-003 - PR (D) GRL-001 - PR (E) GRL-121 - PR (F) Inhibitors - PR monomer.

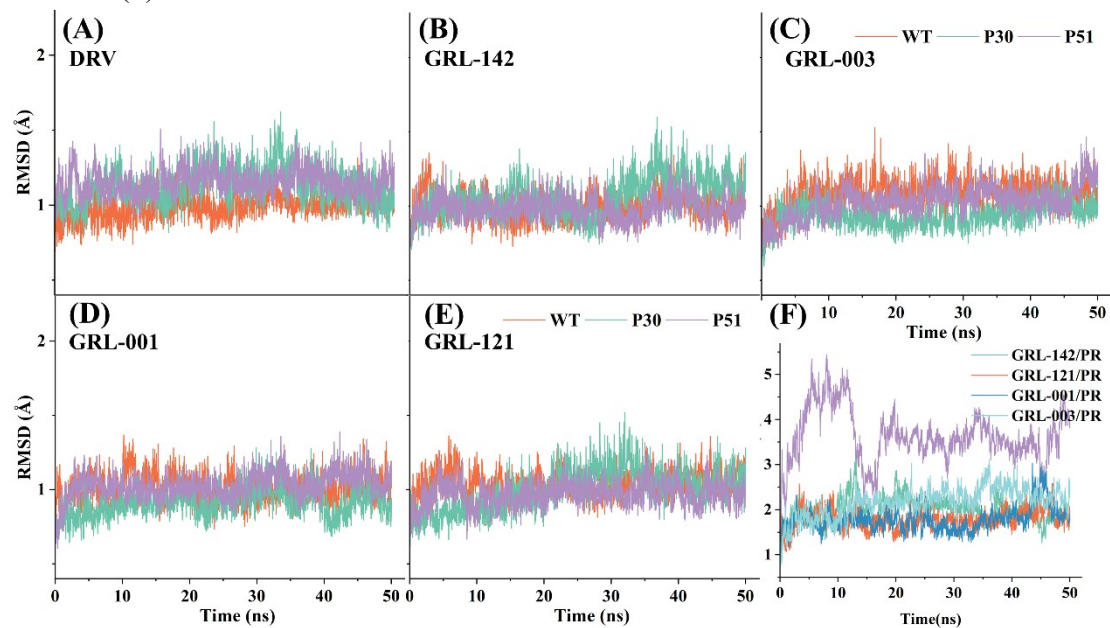

Figure S3: The Root mean square fluctuation (RMSF) of the protein Ca atoms for (A) DRV - PR (B) GRL-142 - PR (C) GRL-003 - PR (D) GRL-001 - PR (E) GRL-121 - PR (F) Inhibitors-PR monomer.

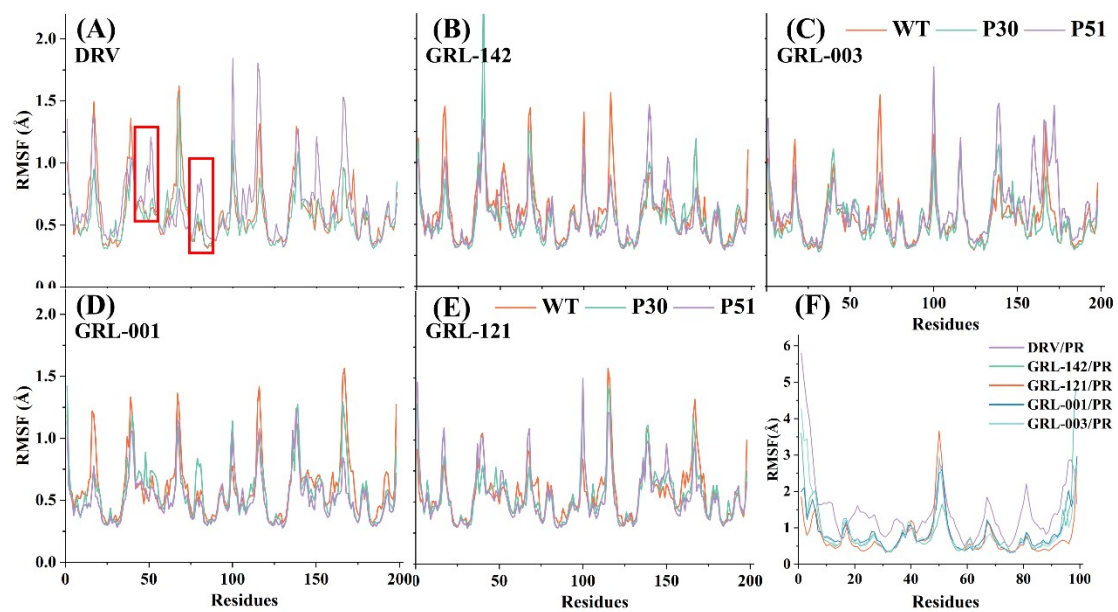

Supplement: d3cp05702j1.pdf [file d3cp05702j1.pdf]
